# Supplementary material for: HbA1c After a Short Period of Monotherapy With Metformin Identifies Durable Glycemic Control Among Adolescents With Type 2 Diabetes
Source: Oxford University Press journal article supplement (doi:10.2337/dc15-0848), 2015-11-04
Supplement: dc150848supplementarydata.pdf [file dc150848supplementarydata.pdf]

## SUPPLEMENTARY DATA

### Listing of TODAY Study Group

The following individuals and institutions constitute the TODAY Study Group (\* indicates principal investigator or director):

**CLINICAL CENTERS** **Baylor College of Medicine:** S. McKay\*, M. Haymond\*, B. Anderson, C. Bush, S. Gunn, H. Holden, S.M. Jones, G. Jeha, S. McGirk, S. Thamocharan **Case Western Reserve University:** L. Cuttler\*, E. Abrams, T. Casey, W. Dahms (deceased), C. Ievers-Landis, B. Kaminski, M. Koontz, S. MacLeish, P. McGuigan, S. Narasimhan **Children's Hospital Los Angeles:** M. Geffner\*, V. Barraza, N. Chang, B. Conrad, D. Dreimane, S. Estrada, L. Fisher, E. Fleury-Milfort, S. Hernandez, B. Hollen, F. Kaufman, E. Law, V. Mansilla, D. Miller, C. Muñoz, R. Ortiz, A. Ward, K. Wexler, Y.K. Xu, P. Yasuda **Children's Hospital of Philadelphia:** L. Levitt Katz\*, R. Berkowitz, S. Boyd, B. Johnson, J. Kaplan, C. Keating, C. Lassiter, T. Lipman, G. McGinley, H. McKnight, B. Schwartzman, S. Willi **Children's Hospital of Pittsburgh:** S. Arslanian\*, F. Bacha, S. Foster, B. Galvin, T. Hannon, A. Kriska, I. Libman, M. Marcus, K. Porter, T. Songer, E. Venditti **Columbia University Medical Center:** R. Goland\*, D. Gallagher, P. Kringas, N. Leibel, D. Ng, M. Ovalles, D. Seidman **Joslin Diabetes Center:** L. Laffel\*, A. Goebel-Fabbri, M. Hall, L. Higgins, J. Keady, M. Malloy, K. Milaszewski, L. Rasbach **Massachusetts General Hospital:** D.M. Nathan\*, A. Angelescu, L. Bissett, C. Ciccarelli, L. Delahanty, V. Goldman, O. Hardy, M. Larkin, L. Levitsky, R. McEachern, D. Norman, D. Nwosu, S. Park-Bennett, D. Richards, N. Sherry, B. Steiner **Saint Louis University:** S. Tollefsen\*, S. Carnes, D. Dempsher, D. Flomo, T. Whelan, B. Wolff **State University of New York Upstate Medical University:** R. Weinstock\*, D. Bowerman, S. Bristol, J. Bulger, J. Hartsig, R. Izquierdo, J. Kearns, R. Saletsky, P. Trief **University of Colorado Denver:** P. Zeitler\* (Steering Committee Chair), N. Abramson, A. Bradhurst, N. Celona-Jacobs, J. Higgins, M.M. Kelsey, G. Klingensmith, K. Nadeau, T. Witten **University of Oklahoma Health Sciences Center:** K. Copeland\* (Steering Committee Vice-Chair), E. Boss, R. Brown, J. Chadwick, L. Chalmers, S. Chernausek, A. Hebensperger, C. Macha, R. Newgent, A. Nordyke, D. Olson, T. Poulsen, L. Pratt, J. Preske, J. Schanuel, S. Sternlof **University of Texas Health Science Center at San Antonio:** J. Lynch\*, N. Amodei, R. Barajas, C. Cody, D. Hale, J. Hernandez, C. Ibarra, E. Morales, S. Rivera, G. Rupert, A. Wauters **Washington University in St Louis:** N. White\*, A. Arbeláez, D. Flomo, J. Jones, T. Jones, M. Sadler, M. Tanner, A. Timpson, R. Welch **Yale University:** S. Caprio\*, M. Grey, C. Guandalini, S. Lavietes, P. Rose, A. Syme, W. Tamborlane

**COORDINATING CENTER** **George Washington University Biostatistics Center:** K. Hirst\*, S. Edelstein, P. Feit, N. Grover, C. Long, L. Pyle

**PROJECT OFFICE** **National Institute of Diabetes and Digestive and Kidney Diseases:** B. Linder\*

**CENTRAL UNITS** **Central Blood Laboratory (Northwest Lipid Research Laboratories, University of Washington):** S.M. Marcovina\*, J. Harting **DEXA Reading Center (University of California at San Francisco):** J. Shepherd\*, B. Fan, L. Marquez, M. Sherman, J. Wang **Diet Assessment Center (University of South Carolina):** M. Nichols\*, E. Mayer-Davis, Y. Liu **Echocardiogram Reading Center (Johns Hopkins University):** J. Lima\*, S. Gidding, J. Puccella, E. Ricketts **Fundus Photography Reading Center (University of Wisconsin):** R. Danis\*, A. Domalpally, A. Goulding, S. Neill, P. Vargo **Lifestyle Program Core (Washington University):** D. Wilfley\*, D. Aldrich-Rasche, K. Franklin, C. Massmann, D. O'Brien, J. Patterson, T. Tibbs, D. Van Buren

**OTHER** **Hospital for Sick Children, Toronto:** M. Palmert **Medstar Research Institute, Washington DC:** R. Ratner **Texas Tech University Health Sciences Center:** D. Dremaine **University of Florida:** J. Silverstein

SUPPLEMENTARY DATA

**Supplementary Table A-1.** Sensitivity (SENS), specificity (SPEC), and positive likelihood ratio (PLR) for select baseline HbA1c cutoffs overall, by gender, by race-ethnicity, and by the interaction of gender with race-ethnicity. Values maximizing the Youden index are highlighted in green.

| Baseline HbA1c cut-off | Overall |      |      | Female |      |      | Male |      |      |
|------------------------|---------|------|------|--------|------|------|------|------|------|
|                        | SENS    | SPEC | PLR  | SENS   | SPEC | PLR  | SENS | SPEC | PLR  |
| 5.5                    | 88.9    | 38.4 | 1.44 | 88.1   | 33.3 | 1.32 | 90.2 | 47.5 | 1.72 |
| 5.6                    | 85.6    | 48.3 | 1.65 | 84.5   | 42.3 | 1.46 | 87.5 | 59.0 | 2.14 |
| 5.7                    | 81.3    | 51.2 | 1.66 | 80.8   | 45.0 | 1.47 | 82.1 | 62.3 | 2.18 |
| 5.8                    | 77.0    | 58.7 | 1.87 | 77.2   | 54.1 | 1.68 | 76.8 | 67.2 | 2.34 |
| 5.9                    | 72.5    | 64.5 | 2.04 | 72.5   | 61.3 | 1.87 | 72.3 | 70.5 | 2.45 |
| 6.0                    | 68.5    | 69.8 | 2.27 | 68.4   | 68.5 | 2.17 | 68.8 | 72.1 | 2.47 |
| 6.1                    | 63.6    | 75.0 | 2.54 | 64.8   | 74.8 | 2.57 | 61.6 | 75.4 | 2.51 |
| 6.2                    | 58.7    | 80.2 | 2.97 | 62.2   | 80.2 | 3.14 | 52.7 | 80.3 | 2.68 |
| 6.3                    | 53.8    | 85.5 | 3.70 | 59.1   | 86.5 | 4.37 | 44.6 | 83.6 | 2.72 |
| 6.4                    | 48.5    | 89.0 | 4.39 | 53.9   | 90.1 | 5.44 | 39.3 | 86.9 | 3.00 |
| 6.5                    | 43.3    | 91.3 | 4.96 | 48.2   | 92.8 | 6.69 | 34.8 | 88.5 | 3.03 |
| 6.6                    | 37.4    | 93.6 | 5.84 | 41.5   | 94.6 | 7.67 | 30.4 | 91.8 | 3.70 |

| Baseline HbA1c cut-off | Non-Hispanic Black |      |      | Hispanic |      |      | Non-Hispanic White |      |      |
|------------------------|--------------------|------|------|----------|------|------|--------------------|------|------|
|                        | SENS               | SPEC | PLR  | SENS     | SPEC | PLR  | SENS               | SPEC | PLR  |
| 5.5                    | 94.0               | 34.0 | 1.43 | 85.7     | 41.4 | 1.46 | 87.5               | 37.2 | 1.39 |
| 5.6                    | 91.5               | 44.7 | 1.65 | 83.2     | 47.1 | 1.57 | 81.3               | 51.2 | 1.66 |
| 5.7                    | 86.3               | 48.9 | 1.69 | 78.2     | 51.4 | 1.61 | 79.2               | 51.2 | 1.62 |
| 5.8                    | 85.5               | 55.3 | 1.91 | 73.9     | 58.6 | 1.78 | 70.8               | 60.5 | 1.79 |
| 5.9                    | 84.6               | 59.6 | 2.09 | 63.9     | 65.7 | 1.86 | 70.8               | 65.1 | 2.03 |
| 6.0                    | 81.2               | 68.1 | 2.54 | 60.5     | 71.4 | 2.12 | 66.7               | 65.1 | 1.91 |
| 6.1                    | 75.2               | 72.3 | 2.72 | 56.3     | 78.6 | 2.63 | 60.4               | 69.8 | 2.00 |
| 6.2                    | 69.2               | 76.6 | 2.96 | 52.9     | 81.4 | 2.85 | 52.1               | 76.7 | 2.24 |
| 6.3                    | 64.1               | 87.2 | 5.02 | 47.1     | 84.3 | 2.99 | 50.0               | 81.4 | 2.69 |
| 6.4                    | 55.6               | 93.6 | 8.70 | 43.7     | 87.1 | 3.40 | 45.8               | 83.7 | 2.82 |
| 6.5                    | 50.4               | 93.6 | 7.90 | 39.5     | 90.0 | 3.95 | 37.5               | 88.4 | 3.23 |
| 6.6                    | 41.0               | 95.7 | 9.64 | 34.5     | 91.4 | 4.02 | 37.5               | 93.0 | 5.37 |

SUPPLEMENTARY DATA

| Baseline HbA1c cut-off | Female NHB |      |       | Female Hispanic |      |      | Female NHW |      |      |
|------------------------|------------|------|-------|-----------------|------|------|------------|------|------|
|                        | SENS       | SPEC | PLR   | SENS            | SPEC | PLR  | SENS       | SPEC | PLR  |
| 5.5                    | 93.8       | 32.3 | 1.38  | 84.1            | 30.2 | 1.20 | 89.7       | 37.0 | 1.42 |
| 5.6                    | 91.3       | 41.9 | 1.57  | 81.2            | 34.9 | 1.25 | 82.8       | 48.1 | 1.60 |
| 5.7                    | 85.0       | 48.4 | 1.65  | 78.3            | 37.2 | 1.25 | 82.8       | 48.1 | 1.60 |
| 5.8                    | 83.8       | 54.8 | 1.85  | 75.4            | 48.8 | 1.47 | 79.3       | 55.6 | 1.78 |
| 5.9                    | 83.8       | 61.3 | 2.16  | 62.3            | 55.8 | 1.41 | 79.3       | 63.0 | 2.14 |
| 6.0                    | 81.3       | 71.0 | 2.80  | 56.5            | 65.1 | 1.62 | 75.9       | 63.0 | 2.05 |
| 6.1                    | 77.5       | 77.4 | 3.43  | 52.2            | 74.4 | 2.04 | 72.4       | 66.7 | 2.17 |
| 6.2                    | 73.8       | 83.9 | 4.57  | 52.2            | 79.1 | 2.49 | 65.5       | 70.4 | 2.21 |
| 6.3                    | 70.0       | 93.5 | 10.85 | 49.3            | 83.7 | 3.03 | 62.1       | 77.8 | 2.79 |
| 6.4                    | 61.3       | 96.8 | 18.99 | 44.9            | 88.4 | 3.86 | 62.1       | 81.5 | 3.35 |
| 6.5                    | 55.0       | 96.8 | 17.05 | 40.6            | 90.7 | 4.36 | 55.2       | 88.9 | 4.97 |
| 6.6                    | 43.8       | 96.8 | 13.56 | 34.8            | 93.0 | 4.99 | 55.2       | 92.6 | 7.45 |

| Baseline HbA1c cut-off | Male NHB |      |      | Male Hispanic |      |      | Male NHW |      |      |
|------------------------|----------|------|------|---------------|------|------|----------|------|------|
|                        | SENS     | SPEC | PLR  | SENS          | SPEC | PLR  | SENS     | SPEC | PLR  |
| 5.5                    | 94.6     | 37.5 | 1.51 | 88.0          | 59.3 | 2.16 | 84.2     | 37.5 | 1.35 |
| 5.6                    | 91.9     | 50.0 | 1.84 | 86.0          | 66.7 | 2.58 | 78.9     | 56.3 | 1.80 |
| 5.7                    | 89.2     | 50.0 | 1.78 | 78.0          | 74.1 | 3.01 | 73.7     | 56.3 | 1.68 |
| 5.8                    | 89.2     | 56.3 | 2.04 | 72.0          | 74.1 | 2.78 | 57.9     | 68.8 | 1.85 |
| 5.9                    | 86.5     | 56.3 | 1.98 | 66.0          | 81.5 | 3.56 | 57.9     | 68.8 | 1.85 |
| 6.0                    | 81.1     | 62.5 | 2.16 | 66.0          | 81.5 | 3.56 | 52.6     | 68.8 | 1.68 |
| 6.1                    | 70.3     | 62.5 | 1.87 | 62.0          | 85.2 | 4.19 | 42.1     | 75.0 | 1.68 |
| 6.2                    | 59.5     | 62.5 | 1.59 | 54.0          | 85.2 | 3.65 | 31.6     | 87.5 | 2.53 |
| 6.3                    | 51.4     | 75.0 | 2.05 | 44.0          | 85.2 | 2.97 | 31.6     | 87.5 | 2.53 |
| 6.4                    | 43.2     | 87.5 | 3.46 | 42.0          | 85.2 | 2.84 | 21.1     | 87.5 | 1.68 |
| 6.5                    | 40.5     | 87.5 | 3.24 | 38.0          | 88.9 | 3.42 | 10.5     | 87.5 | 0.84 |
| 6.6                    | 35.1     | 93.8 | 5.62 | 34.0          | 88.9 | 3.06 | 10.5     | 93.8 | 1.68 |
